# Supplementary material for: Fast Detection of 10 Cannabinoids by RP-HPLC-UV Method in Cannabis sativa L
Source: Molecules. 2019 Jun 4;24(11):2113. doi: 10.3390/molecules24112113 (PMC6600594; doi:10.3390/molecules24112113)
Supplement: Supplementary file 1 [file molecules-24-02113-s001.zip]

Archive with 5 entries (4 files):
- molecules-513726-supple-proofed/
- molecules-513726-supple-proofed/.DS_Store
- molecules-513726-supple-proofed/CalibrationCurves 10.5.19.xlsx
- molecules-513726-supple-proofed/Supplementary material File 1 SOP.pdf
- molecules-513726-supple-proofed/Supplementary material File 2.pdf
