# Supplementary material for: Fast Detection of 10 Cannabinoids by RP-HPLC-UV Method in Cannabis sativa L
Source: Molecules. 2019 Jun 4;24(11):2113. doi: 10.3390/molecules24112113 (PMC6600594; doi:10.3390/molecules24112113)
Supplement: Supplementary file 1 [file molecules-24-02113-s001.zip › molecules-513726-supple-proofed/CalibrationCurves 10.5.19.xlsx]

## Sheet: STD
Standard solutions of cannabinoids
		CBDA			CBGA			CBG			CBD			THCV			CBN				D9-THC			D8-THC			CBC			THCA
Nome del file	µg/mL	RT	H	AREA	RT	H	AREA	RT	H	AREA	RT	H	AREA	RT	H	AREA	RT	H	AREA		RT	H	AREA	RT	H	AREA	RT	H	AREA	RT	H	AREA
std100-1.lcd	100	3.38	442917	1915296	3.66	415710	1989638	3.84	387629	1815849	3.99	297304	1358754	4.17	393490	1829356	5.59	795678	3439436		6.49	458520	1967536	6.62	405771	1739884	7.34	472317	1875838	7.58	453382	1838884
std100-2.lcd	100	3.41	433899	1879258	3.69	406919	1966026	3.87	386590	1789415	4.03	295666	1358814	4.2	393215	1840075	5.63	789260	3395431		6.52	464334	1975191	6.65	411122	1725896	7.37	463496	1848774	7.62	443307	1806892
std100-3.lcd	100	3.41	434072	1879087	3.69	407326	1965289	3.87	386145	1788527	4.03	295413	1364958	4.2	394331	1834335	5.63	789085	3400558		6.52	465390	1982179	6.65	411866	1733886	7.37	462233	1846180	7.62	445357	1814408
std50-1.lcd	50	3.37	218307	955900	3.65	206023	999383	3.82	196662	919769	3.99	151326	697599	4.16	192839	947162	5.58	391903	1700850		6.48	219580	968772	6.61	198519	895384	7.33	233827	923523	7.57	224715	903686
std50-2.lcd	50	3.37	217194	953001	3.65	205652	995391	3.83	195852	915746	3.99	150104	695229	4.16	190378	943254	5.58	389654	1694178		6.48	217347	972528	6.61	196901	877805	7.33	233062	920464	7.57	224148	902641
std50-3.lcd	50	3.37	217533	949105	3.66	204093	993352	3.83	195214	905471	3.99	149969	697360	4.17	189113	937561	5.59	389971	1687619		6.48	215523	951380	6.61	196429	884014	7.33	231227	916086	7.57	223309	896891
std25-1.lcd	25	3.41	107456	470459	3.7	99256	483772	3.87	90744	421048	4.04	68842	319895	4.21	84095	411746	5.63	194063	835514		6.52	96275	412628	6.65	88555	385904	7.37	117310	463739	7.61	108041	435363
std25-2.lcd	25	3.41	106910	468031	3.7	98788	481005	3.88	90443	419549	4.04	68640	319115	4.21	83734	408745	5.63	193867	832691		6.52	95383	407259	6.65	87801	382901	7.37	117002	461030	7.61	107801	432806
std25-3.lcd	25	3.41	107273	470659	3.7	99448	482256	3.88	90093	424156	4.04	68525	319496	4.21	83360	414859	5.63	194181	835264		6.52	95324	410250	6.65	88151	384065	7.38	116032	460666	7.61	107810	433852
std16,67-1.lcd	16.67	3.42	72591	318825	3.71	67656	329888	3.9	61571	287715	4.06	46706	218210	4.22	56512	279226	5.65	132496	571029		6.54	64191	274098	6.67	58779	256499	7.39	77182	303768	7.63	73263	292539
std16,67-2.lcd	16.67	3.42	72315	318634	3.71	67569	329866	3.9	61517	287747	4.06	46650	218380	4.22	56405	279464	5.65	131781	569498		6.54	63999	272371	6.67	58678	253448	7.39	76526	302354	7.63	72459	291226
std16,67-3.lcd	16.67	3.42	72146	317584	3.71	67359	328900	3.9	61355	285204	4.06	46395	219483	4.22	56266	278279	5.65	131923	568115		6.54	63499	270918	6.67	58176	245649	7.39	76314	301199	7.63	72556	289953
std8,33-1.lcd	8.33	3.41	34009	149106	3.7	31211	153688	3.89	28728	132694	4.05	21793	101964	4.21	26324	128710	5.64	61831	264807		6.53	29748	127456	6.66	27686	122599	7.38	36832	145120	7.62	34273	136801
std8,33-2.lcd	8.33	3.42	33860	149691	3.7	31421	154418	3.89	28647	134537	4.05	21768	102234	4.22	26303	130722	5.64	61862	265907		6.53	29868	127024	6.67	27915	123717	7.38	36808	145526	7.62	34104	137113
std8,33-3.lcd	8.33	3.42	34147	149794	3.71	31405	153908	3.89	28886	134676	4.05	21944	102544	4.22	26475	131672	5.64	61843	265948		6.53	29881	127779	6.67	27822	121822	7.38	36949	145546	7.62	34276	137221
std4,17-1.lcd	4.17	3.42	17292	76270	3.71	16049	79297	3.9	14552	68225	4.06	11088	52660	4.22	13336	67305	5.65	31358	134669		6.54	14734	63355	6.67	13716	59757	7.39	18347	72757	7.63	17272	69562
std4,17-2.lcd	4.17	3.42	17282	76239	3.71	16043	79002	3.9	14542	68066	4.06	11066	52826	4.22	13290	66097	5.65	31309	134536		6.54	14665	62858	6.67	13631	59582	7.39	18272	72243	7.63	17350	69391
std4,17-3.lcd	4.17	3.42	17257	76191	3.71	16031	78834	3.9	14561	68433	4.06	11067	52282	4.22	13272	66330	5.65	31392	134197		6.54	14488	62967	6.67	13471	58570	7.39	18227	71858	7.63	17398	69403
std0,5-5.lcd	0.5	3.42	2084	8980	3.72	1894	9169	3.9	1591	7517	4.06	1238	5995	4.22	1395	7059	5.65	3619	15530		6.54	1181	4956	6.67	1088	4447	7.39	2001	7870	7.63	2089	8335
std0,5-6.lcd	0.5	3.42	2080	8963	3.72	1912	9225	3.9	1597	7520	4.06	1214	5772	4.22	1373	6628	5.65	3623	15607		6.54	1215	5115	6.67	1138	4705	7.39	2022	7938	7.63	2095	8383
std0,5-7.lcd	0.5	3.42	2077	8963	3.72	1902	9172	3.9	1572	7392	4.06	1221	5860	4.22	1367	6883	5.65	3626	15571		6.54	1110	4546	6.67	1040	4144	7.39	1985	7764	7.63	2085	8257
std0,05-2.lcd	0.05	3.42	210	900	3.71	195	1038	3.9	161	871	4.06	132	807	4.22	134	682	5.65	363	1534		6.53	89	318	6.67	74	245	7.39	199	767	7.63	216	855
std0,05-3.lcd	0.05	3.42	210	891	3.71	190	1001	3.9	157	890	4.06	133	799	4.22	132	706	5.65	364	1564		6.53	87	312	6.67	79	274	7.39	198	750	7.63	212	840
std0,05-4.lcd	0.05	3.42	214	932	3.71	194	1052	3.9	156	832	4.06	134	829	4.22	135	718	5.65	374	1704		6.53	86	315	6.67	71	238	7.39	193	741	7.63	210	819
